# Supplementary material for: Imputing missing data of function and disease activity in rheumatoid arthritis registers: what is the best technique?
Source: PubMed Central journal article supplement — RMD Open. 2019 Oct 17;5(2):e000994. doi: 10.1136/rmdopen-2019-000994 (PMC6802981; doi:10.1136/rmdopen-2019-000994), 2019-10-17
Supplement: rmdopen-2019-000994supp001.pdf [file rmdopen-2019-000994supp001.pdf]

```

# Imputations methods used in the article
# the given functions estimate the values of the variables for a given time
# all functions take as input:
# - df: a data.frame in the long format containing the register data
# - time: a string: the name of the column containing the time elapsed since treatment onset. must be
numeric
# - id : a string: the names of the column containing the patient-treatment identifiers
# - variables. a vector of strings, containing the names of the column with the data to be imputed.
# - t0: a numerical value: the imputation time, in the same unit as the time column

# check if the packages are installed, and install it if not
list.of.packages <- c("data.table","mice","zoo","lme4")
new.packages <- list.of.packages[!(list.of.packages %in% installed.packages()[,"Package"])]
if(length(new.packages)) install.packages(new.packages)

# load the libraries
library(data.table)
library(mice)
library(zoo)
library(lme4)

# function to perform basic checks on the data provided
basic_checks = function(df,time,id,variables,t0){

  # check if arguments are strings
  for(var in c(variables,time,id)){if(!is.character(var))stop(paste0(deparse(substitute(var))," argument
is not a character"))}
  # check if time, id and variables are column names
  for(var in c(variables,time,id)){if(!var %in% names(df))stop(paste0(deparse(substitute(var))," is not a
column name of df"))}
  # check if times are numeric
  if(!is.numeric(df[[time]]))stop('time column is not numeric')
  if(!is.numeric(t0))stop('t0 is not numeric')

  # create a temporary data.table
  temp_df <- setDT(df)[,SD,.SDcols = c(id,time,variables)]
  # check for duplicated time measures
  if(length(unique(temp_df[,N,by = c(time,id)]$N)) != 1 )stop('there are duplicated time measures for
the same id')
  # check for the value of t0
  if(t0 < min(temp_df[[time]],na.rm = T) | t0 > max(df[[time]],na.rm = T))warning("'t0 is out of the range
of values present in the time column")

  setnames(temp_df,c(time,id),c("time","id"))
  temp_df[,diff := abs(time - t0)] # to get the closest value to t0
  temp_df[,diffposneg := (time - t0)] # to have time direction
  temp_df[,time2 := time^2/10] # variable for regressions
  temp_df[,time3 := time^3/100] # variable for regressions

  return(temp_df)
}

```

```

LOCF = function(df,time,id,variables,t0){
  temp_df <- basic_checks(df,time,id,variables,t0)
  # order(diffT) classify the data frame in order from closest to t0 to furthest
  plouf <- lapply(variables,function(x){
    temp_df[order(diffT)][diffTposneg < 0 & !is.na(get(x)),setNames(list( get(x)[1]),
paste0(x,"_LOCF")),by = id]
  })
  return(Reduce(function(x,y){merge(x,y,all = T,by = "id")},plouf))
}

```

```

NAO = function(df,time,id,variables,t0){
  temp_df <- basic_checks(df,time,id,variables,t0)
  plouf <- lapply(variables,function(x){
    temp_df[order(diffT)][!is.na(get(x)),setNames(list( get(x)[1]), paste0(x,"_NAO")),by = id]
  })
  return(Reduce(function(x,y){merge(x,y,all = T,by = "id")},plouf))
}

```

```

LE = function(df,time,id,variables,t0){
  temp_df <- basic_checks(df,time,id,variables,t0)
  plouf <- lapply(variables,function(x){
    temp_df[order(diffT)][!is.na(get(x)),
      setNames(list( (get(x)[1]-get(x)[2] )/(time[1]-time[2])*(t0 - time[1]) + get(x)[1] ),
paste0(x,"_LE")),by = id]
  })
  return(Reduce(function(x,y){merge(x,y,all = T,by = "id")},plouf))
}

```

```

LFE = function(df,time,id,variables,t0){
  temp_df <- basic_checks(df,time,id,variables,t0)
  plouf <- lapply(variables,function(x){
    temp_df[order(diffT)][diffTposneg < 0 & !is.na(get(x)),
      setNames(list( (get(x)[1]-get(x)[2] )/(time[1]-time[2])*(t0 - time[1]) + get(x)[1] ),
paste0(x,"_LFE")),by = id]
  })
  output <- Reduce(function(x,y){merge(x,y,all = T,by = "id")},plouf)
  NAresults <- data.table(id = setdiff(unique(temp_df$id),output$id))
  NAresults[,paste0(variables,"_LFE") := NA]
  return(rbind(NAresults,output))
}

```

```

PE = function(df,time,id,variables,t0){
  temp_df <- basic_checks(df,time,id,variables,t0)

  plouf <- lapply(variables,function(x){
    formula <- c(as.formula(paste0(x," ~ 1")),
      as.formula(paste0(x," ~ time")),
      as.formula(paste0(x," ~ time + time2")),

```

```

      as.formula(paste0(x," ~ time + time2 + time3")))
  impute <- data.frame(time = t0,time2 = t0^2/10, time3 = t0^3/100)
  temp_df[!is.na(get(x)), setNames(list(
    if(.N <= 4){predict(lm(formula[.N][[1]],data = .SD),newdata = impute)} else
    if(.N > 4) {predict(lm(formula[4][[1]],data = .SD),newdata = impute)}
  ),paste0(x,"_PE")),by = id ]
})
output <- Reduce(function(x,y){merge(x,y,all = T,by = "id")},plouf)
NAresults <- data.table(id = setdiff(unique(temp_df$id),output$id))
NAresults[,paste0(variables,"_PE") := NA]
return(rbind(NAresults,output))
}

LME3 = function(df,time,id,variables,t0){
  temp_df <- basic_checks(df,time,id,variables,t0)
  plouf <- lapply(variables,function(x){
    imp <- predict(lmer(paste0(x,"~ time + time2 + time3 + ( time + time2 + time3| id)"),
      data=temp_df,
      control = lmerControl(calc.derivs = FALSE,optimizer = "nloptwrap")),
      newdata = temp_df[,.(time = t0, time2 = t0^2/10, time3 = t0^3/100),by = id])
    data.frame( setNames(list( unique(temp_df$id), imp ),c("id",paste0(x,"_LME3")) ) )
  })
  return(Reduce(function(x,y){merge(x,y,all = T,by = "id")},plouf))
}

# to test
df <- data.table(id = rep(LETTERS[1:5],each = 10))
df[,time := sample(seq(0,30,0.1),.N),by = id ] # create time variable
df[,c("var1","var2") := lapply(1:2,function(x){sample(1:40,.N,replace = T)}),by = id] # create variables to
impute

for(var in c("var1","var2")){df[sample(1:.N,10),c(var) := NA]} # create missing data

# exemple for each method
test <- NAO(df,"time","id",c("var1","var2"),6)
test2 <- LOCF(df,"time","id",c("var1","var2"),6)
test3 <- LFE(df,"time","id",c("var1","var2"),6)
test4 <- PE(df,"time","id",c("var1","var2"),6)
test5 <- LME3(df,"time","id",c("var1","var2"),6)

```
