# Supplementary material for: Imputing missing data of function and disease activity in rheumatoid arthritis registers: what is the best technique?
Source: PubMed Central journal article supplement — RMD Open. 2019 Oct 17;5(2):e000994. doi: 10.1136/rmdopen-2019-000994 (PMC6802981; doi:10.1136/rmdopen-2019-000994), 2019-10-17
Supplement: rmdopen-2019-000994supp002.pdf [file rmdopen-2019-000994supp002.pdf]

## Supplementary Tables

Supplementary Table 1

| DAS28 mean       | DAS28 true | DAS28 bias (%)         | method | t  |
|------------------|------------|------------------------|--------|----|
|                  | 5.16       |                        | LOCF   | 0  |
|                  | 5.16       |                        | LFE    | 0  |
| 3.19 (3.12;3.25) | 5.16       | -38.23 (-39.36;-37.09) | NAO    | 0  |
| 3.49 (3.29;3.69) | 5.16       | -32.38 (-36.21;-28.56) | LE     | 0  |
| 3.87 (3.68;4.06) | 5.16       | -25.03 (-28.71;-21.35) | PE     | 0  |
| 3.79 (3.73;3.86) | 5.16       | -26.43 (-28.08;-24.79) | LME3   | 0  |
| 3.53 (3.47;3.58) | 5.16       | -31.66 (-33.27;-30.05) | MICE   | 0  |
| 3.81 (3.71;3.91) | 3.20       | 18.94 (15.86;22.01)    | LOCF   | 6  |
| 2.06 (1.87;2.24) | 3.20       | -35.7 (-41.39;-30)     | LFE    | 6  |
| 3.37 (3.3;3.44)  | 3.20       | 5.29 (3.14;7.44)       | NAO    | 6  |
| 3.04 (2.87;3.2)  | 3.20       | -5.19 (-10.26;-0.13)   | LE     | 6  |
| 3.54 (3.39;3.7)  | 3.20       | 10.6 (5.79;15.41)      | PE     | 6  |
| 3.62 (3.58;3.66) | 3.20       | 13.13 (11.08;15.18)    | LME3   | 6  |
| 3.31 (3.26;3.36) | 3.20       | 3.4 (0.95;5.84)        | MICE   | 6  |
| 3.47 (3.38;3.56) | 3.00       | 15.7 (13.02;18.38)     | LOCF   | 12 |
| 2.84 (2.65;3.03) | 3.00       | -5.46 (-11.71;0.79)    | LFE    | 12 |
| 3.17 (3.1;3.23)  | 3.00       | 5.54 (3.52;7.56)       | NAO    | 12 |
| 3.07 (2.87;3.26) | 3.00       | 2.2 (-4.18;8.57)       | LE     | 12 |
| 3.3 (3.14;3.46)  | 3.00       | 9.99 (4.64;15.34)      | PE     | 12 |
| 3.28 (3.24;3.31) | 3.00       | 9.23 (7.35;11.11)      | LME3   | 12 |
| 3.23 (3.19;3.28) | 3.00       | 7.83 (5.23;10.42)      | MICE   | 12 |
| 3.08 (3.01;3.15) | 2.94       | 4.93 (2.74;7.12)       | LOCF   | 24 |
| 2.66 (2.49;2.83) | 2.94       | -9.44 (-15.05;-3.83)   | LFE    | 24 |
| 2.96 (2.9;3.02)  | 2.94       | 0.69 (-1.23;2.62)      | NAO    | 24 |
| 2.21 (1.97;2.44) | 2.94       | -24.79 (-32.71;-16.86) | LE     | 24 |
| 3.2 (3.02;3.37)  | 2.94       | 8.85 (2.81;14.88)      | PE     | 24 |
| 2.77 (2.73;2.81) | 2.94       | -5.62 (-7.49;-3.75)    | LME3   | 24 |
| 3.04 (2.99;3.08) | 2.94       | 3.43 (0.8;6.06)        | MICE   | 24 |

Supplementary Table S1: relative bias (mean (CI)) of the mean DAS for 60% missing data at follow-up time, several follow-up (t) and imputation methods (method): Last Observation Carried Forward (LOCF), Linear Forward Extrapolation (LFE), Nearest Available Observation (NAO), Linear Extrapolation (LE), Polynomial Extrapolation (PE), Linear Mixed Effect cubic regression (LME3) and Multiple Imputation by Chained Equation (MICE).

Supplementary Table 2

| HAQ mean         | HAQ true | HAQ bias (%)           | method | t  |
|------------------|----------|------------------------|--------|----|
|                  | 1.22     |                        | LOCF   | 0  |
|                  | 1.22     |                        | LFE    | 0  |
| 0.84 (0.8;0.87)  | 1.22     | -31.3 (-33.24;-29.35)  | NAO    | 0  |
| 0.77 (0.67;0.86) | 1.22     | -36.94 (-44.53;-29.34) | LE     | 0  |
| 0.9 (0.86;0.95)  | 1.22     | -25.95 (-29.22;-22.68) | PE     | 0  |
| 0.92 (0.89;0.95) | 1.22     | -24.28 (-26.62;-21.94) | LME3   | 0  |
| 0.9 (0.87;0.92)  | 1.22     | -26.3 (-29.87;-22.72)  | MICE   | 0  |
| 0.93 (0.89;0.98) | 0.83     | 11.79 (7.54;16.05)     | LOCF   | 6  |
| 0.73 (0.65;0.8)  | 0.83     | -12.98 (-21.65;-4.31)  | LFE    | 6  |
| 0.87 (0.84;0.91) | 0.83     | 4.6 (2.17;7.02)        | NAO    | 6  |
| 0.78 (0.73;0.83) | 0.83     | -6.14 (-11.12;-1.17)   | LE     | 6  |
| 0.88 (0.84;0.92) | 0.83     | 6.01 (2.72;9.3)        | PE     | 6  |
| 0.91 (0.88;0.94) | 0.83     | 9.31 (6.62;12)         | LME3   | 6  |
| 0.87 (0.84;0.9)  | 0.83     | 4.33 (0.43;8.24)       | MICE   | 6  |
| 0.9 (0.86;0.94)  | 0.81     | 10.86 (7.38;14.34)     | LOCF   | 12 |
| 0.82 (0.76;0.89) | 0.81     | 1.53 (-5.54;8.61)      | LFE    | 12 |
| 0.86 (0.83;0.89) | 0.81     | 5.99 (3.59;8.38)       | NAO    | 12 |
| 0.8 (0.76;0.84)  | 0.81     | -1.65 (-5.51;2.21)     | LE     | 12 |
| 0.83 (0.8;0.87)  | 0.81     | 2.85 (-0.53;6.23)      | PE     | 12 |
| 0.88 (0.85;0.9)  | 0.81     | 7.91 (5.47;10.36)      | LME3   | 12 |
| 0.87 (0.84;0.9)  | 0.81     | 7.32 (3.39;11.24)      | MICE   | 12 |
| 0.84 (0.81;0.88) | 0.82     | 2.59 (-0.16;5.35)      | LOCF   | 24 |
| 0.83 (0.78;0.89) | 0.82     | 1.61 (-4.07;7.29)      | LFE    | 24 |
| 0.82 (0.79;0.86) | 0.82     | 0.32 (-1.89;2.52)      | NAO    | 24 |
| 0.73 (0.67;0.79) | 0.82     | -10.91 (-17.42;-4.39)  | LE     | 24 |
| 0.87 (0.82;0.91) | 0.82     | 5.68 (1.47;9.88)       | PE     | 24 |
| 0.79 (0.76;0.82) | 0.82     | -4.1 (-6.41;-1.8)      | LME3   | 24 |
| 0.82 (0.79;0.85) | 0.82     | 0.63 (-3.52;4.77)      | MICE   | 24 |

Supplementary Table S3: relative bias (mean (CI)) of the mean HAQ for 60% missing data at follow-up time, several follow-up (t) and imputation methods (method): Last Observation Carried Forward (LOCF), Linear Forward Extrapolation (LFE), Nearest Available Observation (NAO), Linear Extrapolation (LE), Polynomial Extrapolation (PE), Linear Mixed Effect cubic regression (LME3) and Multiple Imputation by Chained Equation (MICE).

Supplementary Table 3

| Remission           |       | LDA                 |       | method | t0 |
|---------------------|-------|---------------------|-------|--------|----|
| Imputed             | True  | Imputed             | True  |        |    |
|                     | 3.7%  |                     | 8%    | LOCF   | 0  |
|                     | 3.7%  |                     | 8%    | LFE    | 0  |
| 23.1% (21.7%;24.6%) | 3.7%  | 35.2% (33.6%;36.8%) | 8%    | NAO    | 0  |
| 23.3% (21.8%;24.8%) | 3.7%  | 32% (30.4%;33.5%)   | 8%    | LE     | 0  |
| 23.7% (22.2%;25.3%) | 3.7%  | 31.5% (29.9%;33.1%) | 8%    | PE     | 0  |
| 4.6% (3.1%;6.1%)    | 3.7%  | 15% (12.5%;17.5%)   | 8%    | LME3   | 0  |
| 2.9% (1.9%;3.9%)    | 3.7%  | 17.6% (14.9%;20.2%) | 8%    | MICE   | 0  |
| 29.7% (27.8%;31.6%) | 34.9% | 45.7% (43.5%;47.8%) | 52.4% | LOCF   | 6  |
| 43.3% (40.5%;46.1%) | 34.9% | 58.4% (55.4%;61.3%) | 52.4% | LFE    | 6  |
| 35% (33.5%;36.5%)   | 34.9% | 50.9% (49.2%;52.6%) | 52.4% | NAO    | 6  |
| 37.5% (35.8%;39.2%) | 34.9% | 52.3% (50.5%;54.1%) | 52.4% | LE     | 6  |
| 35% (33.3%;36.7%)   | 34.9% | 51.4% (49.5%;53.2%) | 52.4% | PE     | 6  |
| 18.7% (17%;20.4%)   | 34.9% | 39.6% (37.6%;41.6%) | 52.4% | LME3   | 6  |
| 21.7% (19.7%;23.7%) | 34.9% | 47.3% (44.5%;50%)   | 52.4% | MICE   | 6  |
| 36.1% (34.3%;37.9%) | 42.3% | 51.7% (49.8%;53.6%) | 57.9% | LOCF   | 12 |
| 45.1% (42.6%;47.6%) | 42.3% | 58.9% (56.4%;61.4%) | 57.9% | LFE    | 12 |
| 39.6% (38%;41.3%)   | 42.3% | 56.4% (54.7%;58.1%) | 57.9% | NAO    | 12 |
| 40.7% (39%;42.5%)   | 42.3% | 55.9% (54.2%;57.6%) | 57.9% | LE     | 12 |
| 40.8% (39%;42.7%)   | 42.3% | 56.9% (55.1%;58.7%) | 57.9% | PE     | 12 |
| 27.9% (26.2%;29.6%) | 42.3% | 52.2% (50.5%;53.9%) | 57.9% | LME3   | 12 |
| 26.1% (24%;28.3%)   | 42.3% | 52% (49.1%;54.9%)   | 57.9% | MICE   | 12 |
| 42% (40.3%;43.7%)   | 43.4% | 60.2% (58.5%;61.8%) | 63.4% | LOCF   | 24 |
| 50.6% (48.4%;52.7%) | 43.4% | 66.1% (64%;68.2%)   | 63.4% | LFE    | 24 |
| 43.8% (42.2%;45.4%) | 43.4% | 62.8% (61.3%;64.3%) | 63.4% | NAO    | 24 |
| 47.2% (45.4%;48.9%) | 43.4% | 64.7% (63.1%;66.4%) | 63.4% | LE     | 24 |
| 45.9% (44.1%;47.7%) | 43.4% | 62.9% (61.2%;64.6%) | 63.4% | PE     | 24 |
| 43% (41.1%;44.8%)   | 43.4% | 70.4% (68.6%;72.3%) | 63.4% | LME3   | 24 |
| 33.4% (31.2%;35.5%) | 43.4% | 61.8% (59.2%;64.5%) | 63.4% | MICE   | 24 |

Supplementary Table 4 : remission rate (mean (CI)) of DAS for several follow-up (t) and imputation methods (method): Last Observation Carried Forward (LOCF), Linear Forward Extrapolation (LFE), Nearest Available Observation (NAO), Linear Extrapolation (LE), Polynomial Extrapolation (PE), Linear Mixed Effect cubic regression (LME3) and Multiple Imputation by Chained Equation (MICE).
